# Supplementary material
Source: PubMed Central journal article supplement (PMC2200849)
Supplement: blood_blood-2007-07-099283_1.pdf [file blood_blood-2007-07-099283_1.pdf]

EBMT Participating centers listed with their Centre Identification Code (CIC).

The following centers have contributed with reports and breast cancer cases. The number of breast cancer cases appears in parentheses: 207 Hopital St Louis , Paris(5), 205 Imperial College London, Hammersmith Hospital (4), 212 Karolinska University Hospital, Stockholm (3), 253 Hotel Dieu, Nantes (3), 202 Basel Hospital University (2), 234 Cliniques Universitaires St Luc, Brussels (2), 206 Rigshospitalet, Copenhagen (1), , 208 University Hospital Zürich (1), , 217 Ospedale San Martino, Genova(1),), 237 University Medical Center St. Radboud, Nijmegen (1), 242 Hospital U Marqués de Valdecilla, Santander(1), 248 UTIE Pescara(1), 261 Hopital Cantonal Universitaire Genève(1), 566 Addenbrookes Hospital, Cambridge 744 University Hospital Gent(1), 807 Charité Universitätsmedizin, Berlin(1).

The following EBMT centers have contributed with reports: 160 Hôpital Necker, Paris; 203 Leiden University Hospital; 209 University Hospital Gasthuisberg, Leuven; 215 Institut Jules Bordet, Brussels; 219 University of Helsinki; 227 Medizinische Universitaet Wien; 231 Azienda Ospedaliera S. Giovanni, Torino; 232 Univ.`La Sapienza`, Rome; 239 University Medical Centre, Utrecht; 255 The Oxford Radcliffe Hospital; 258 Hadassah University Hospital, Jerusalem; 264 Hopital La Miletrie, Poitiers; 266 Uppsala University Hospital; 268 Belfast City Hospital; 273 Fédération de Greffe de Moelle et de Thérapie Cellulaire d`Auvergne, Clermont-Ferrand; 274 Institute G. Gaslini, Genova; 279 Clinica Pediatrica dell'Università di Milano-Bicocca; 283 University Hospital, Lund; 284 Birmingham Heartlands Hospital; 287 Ospedale S. Camillo-Forlanini, Rome; 301 Hopital d`Enfants de la Timone, Marseille; 304 Ospedale di Careggi, Firenze; 305 University of Torino; 307 Universita Cattolica S. Cuore, Rome; 372

Gülhane Military Medical Academy, Ankara; 506 A.Z. Sint-Jan, Brugge; 513 Klinikum Grosshadern, Munich; 524 University of Heidelberg; 538 Lower Silesian Centre, Wroclaw; 539 St. George's Hospital, London; 561 George Papanicolaou General Hospital; Exokhi Thessaloniki; 581 Wellington Hospital; 587 Azienda Ospedaliera, Reggio Calabria; 588 VU University Medical Center Amsterdam; 592 Klinik für Knochenmarktransplantation, Idar-Oberstein; 594 Elisabethinen-Hospital, Linz; 614 University Hospital Eppendorf, Hamburg; 616 University of Milano; 623 Policlinico G.B. Rossi , Verona; 630 University Hospital VUB, Brussels; 640 University Med. Center, Ljubljana; 641 Poznan University of Medical Sciences; 651 Universitaetsklinikum, Düsseldorf; 653 Hospital Infantil La Fe , Valencia; 656 Institute of Hematology and Blood Transfusion, Prague; 671 Hopital E. Herriot, Lyon; 672 Strasbourg; 711 The Children's Hospital at Westmead, Sydney; 713 Leicester Royal Infirmary; 717 Nottingham City Hospital; 718 Charles University Hospital, Pilsen; 726 University of Liege; 731 Umea University Hospital; 734 Hospital Infantil La Paz, Madrid; 740 University Hospital, Linköping; 754 Tel-Aviv University; 760 Istanbul Tip Fakueltesi; 772 Constantiaberg Medi-Clinic, Cape Town; 773 Royal Liverpool Children's NHS Trust; 774 Our Lady`s Hospital for Sick Children, Dublin; 781 Birmingham Children's Hospital; 783 AZ Middelheim, Antwerp; 794 University of Perugia; 797 S. Bartolo Hospital, Vicenza; 810 University of Freiburg; 819 Hospital Gregorio Marañón, Madrid.
